# Supplementary material for: Hexacoordinated Co(ii) complex exhibiting strong magnetic anisotropy and field-induced slow magnetization relaxation: synthesis, magnetic characterization, and quantum-chemical modelling
Source: Royal Society of Chemistry journal article supplement (doi:10.1039/d3nj01481a), 2023-01-01
Supplement: d3nj01481a1.pdf [file d3nj01481a1.pdf]

## Hexacoordinated Co(II) complex exhibiting strong magnetic anisotropy and field-induced slow magnetization relaxation: synthesis, magnetic characterization, and quantum-chemical modelling

Yulia P. Tupolova,<sup>†</sup> Vladimir E. Lebedev,<sup>†</sup> Denis V. Korchagin,<sup>\*,‡</sup> Valery V. Tkachev, Andrey N. Utenyshev,<sup>‡</sup> Roman B. Morgunov,<sup>‡</sup> Andrei V. Palii,<sup>‡</sup> Igor N. Shcherbakov,<sup>\*,†</sup> Sergey M. Aldoshin<sup>‡</sup>

<sup>†</sup> Department of Chemistry, Southern Federal University, 7, Zorge Str., Rostov-on-Don, 344090, Russia.

<sup>‡</sup> Federal Research Center of Problems of Chemical Physics and Medicinal Chemistry of RAS, Chernogolovka, Moscow Region, 142432, Russia.

Table S1. Crystallographic data and details of the crystallographic experiment and refinement procedure for **1**

| Parameters                             | Values                                                                                                |
|----------------------------------------|-------------------------------------------------------------------------------------------------------|
| Empirical formula, moieties            | C <sub>24</sub> H <sub>20</sub> CoN <sub>8</sub> S <sub>2</sub> , 2(C <sub>2</sub> H <sub>6</sub> OS) |
| Formula weight                         | 699.79                                                                                                |
| Temperature (K)                        | 100.01(10)                                                                                            |
| $\lambda$ , Å                          | MoK $\alpha$ (0.71073)                                                                                |
| Crystal system                         | Monoclinic                                                                                            |
| Space group                            | C 2/c                                                                                                 |
| $a$ , Å                                | 14.6399(8)                                                                                            |
| $b$ , Å                                | 13.9674(5)                                                                                            |
| $c$ , Å                                | 17.1940(16)                                                                                           |
| $\beta$ °                              | 114.285(5)                                                                                            |
| $V$ , Å <sup>3</sup>                   | 3204.7(4)                                                                                             |
| $Z$                                    | 4                                                                                                     |
| $d_{\text{calc}}$ (Mg/m <sup>3</sup> ) | 1.450                                                                                                 |
| $\mu$ , mm <sup>-1</sup>               | 0.836                                                                                                 |
| $F(000)$                               | 1452                                                                                                  |
| Crystal shape, size                    | Prism, 0.34 x 0.32 x 0.27 mm.                                                                         |
| $\theta$ range, °                      | 3.05-32.07                                                                                            |
| Index ranges                           | -21 $\leq h \leq$ 19, -20 $\leq k \leq$ 20, -25 $\leq l \leq$ 24                                      |
| Reflections collected/unique           | 23560/5529                                                                                            |
| Reflections $I > 2\sigma(I)$           | 4802                                                                                                  |

|                                                  |                                      |
|--------------------------------------------------|--------------------------------------|
| Refinement procedure                             | Full-matrix least squares on $F^2$ . |
| Number of refined parameters                     | 233                                  |
| Goof                                             | 1.148                                |
| R indices $F^2 > 2\sigma(F^2)$                   | $R_1 = 0.0468$ , $wR_2 = 0.0947$     |
| R indices (all data)                             | $R_1 = 0.0564$ , $wR_2 = 0.0984$     |
| Min. and Max. Resd. Dens.<br>[e/Å <sup>3</sup> ] | -0.58, 0.54                          |

Table S2. Selected bond lengths (Å), bond and torsion angles (degrees) of **1** (symmetry code a: 1-x, y, 1/2-z)

| Bond lengths, Å     |            |                |            |                |             |
|---------------------|------------|----------------|------------|----------------|-------------|
| Co-N1               | 2.1172(14) | N2-C3          | 1.373(2)   | C9-C10         | 1.377(2)    |
| Co-N3               | 2.2209(14) | N3-C3          | 1.324(2)   | C10-C11        | 1.409(2)    |
| Co-N4               | 2.0706(15) | C3-C4          | 1.420(2)   | N3-C11         | 1.380(2)    |
| N4-C12              | 1.153(2)   | C4-C5          | 1.355(2)   | C6-C11         | 1.414(2)    |
| S1-C12              | 1.6315(19) | C5-C6          | 1.420(2)   | C1-C2          | 1.489(2)    |
| C1-C1_a             | 1.478(3)   | C6-C7          | 1.412(2)   | S2-O1          | 1.380(5)    |
| N1-C1               | 1.292(2)   | C7-C8          | 1.373(3)   | S2-C13         | 1.776(3)    |
| N1-N2               | 1.3530(19) | C8-C9          | 1.405(3)   | S2-C14         | 1.764(4)    |
| Bond angles, deg    |            |                |            |                |             |
| N1-Co-N3            | 73.87(5)   | Co-N4-C12      | 169.79(14) | N1-Co-N4       | 98.30(6)    |
| N1-C1-C1_a          | 113.22(15) | N1-Co-N1_a     | 72.30(5)   | N1-C1-C2       | 125.56(15)  |
| N1-Co-N3_a          | 145.53(5)  | C1_a-C1-C2     | 121.20(15) | N1-Co-N4_a     | 91.08(6)    |
| N3-Co-N4            | 87.39(6)   | N3-C3-C4       | 124.29(16) | N3-Co-N3_a     | 140.44(5)   |
| N2-C3-C4            | 117.46(15) | N3-Co-N4_a     | 88.69(6)   | N2-C3-N3       | 118.24(14)  |
| C3-C4-C5            | 118.08(16) | C4-C5-C6       | 120.45(16) | N4-Co-N4_a     | 168.39(6)   |
| C7-C6-C11           | 119.34(16) | C5-C6-C11      | 117.37(15) | C5-C6-C7       | 123.25(16)  |
| C6-C7-C8            | 120.38(17) | C7-C8-C9       | 120.32(18) | C8-C9-C10      | 120.21(18)  |
| Co-N1-N2            | 116.77(10) | Co-N3-C3       | 113.24(11) | Co-N3-C11      | 128.52(11)  |
| Co-N1-C1            | 120.59(11) | S1-C12-N4      | 179.62(16) |                |             |
| Torsion angles, deg |            |                |            |                |             |
| N3-Co-N1-N2         | -8.27(14)  | C2-C1-C1a-C2_a | 7.0(3)     | N3_a-Co-N3-C11 | 2.5(2)      |
| N3-Co-N1-C1         | 174.35(18) | N2-C3-C4-C5    | 176.2(2)   | N4_a-Co-N3-C3  | -81.73(14)  |
| N4-Co-N1-N2         | -93.09(14) | N3-C3-C4-C5    | -2.7(3)    | N4_a-Co-N3-C11 | 86.85(17)   |
| N4-Co-N1-C1         | 89.52(17)  | C3-C4-C5-C6    | 2.9(3)     | Co-N1-N2-C3    | 5.9(2)      |
| N1_a-Co-N1-N2       | 178.43(16) | C4-C5-C6-C7    | 178.6(2)   | C1-N1-N2-C3    | -176.8(2)   |
| N1_a-Co-N1-C1       | 1.05(16)   | C4-C5-C6-C11   | 0.7(3)     | Co-N1-C1-C2    | 175.44(18)  |
| N3_a-Co-N1-N2       | 167.02(13) | C5-C6-C7-C8    | -176.5(2)  | Co-N1-C1-C1_a  | -2.6(2)     |
| N3_a-Co-N1-C1       | -10.4(2)   | C11-C6-C7-C8   | 1.3(3)     | N2-N1-C1-C2    | -1.8(3)     |
| N4_a-Co-N1-N2       | 80.06(14)  | C5-C6-C11-N3   | -5.1(3)    | N2-N1-C1-C1_a  | -179.86(18) |
| N4_a-Co-N1-C1       | -97.33(17) | C5-C6-C11-C10  | 173.79(19) | N1-N2-C3-N3    | 3.4(3)      |
| N1-Co-N3-C3         | 9.78(14)   | C7-C6-C11-N3   | 176.97(19) | N1-N2-C3-C4    | -175.52(18) |

|                 |             |                 |             |               |             |
|-----------------|-------------|-----------------|-------------|---------------|-------------|
| N1-Co-N3-C11    | 178.35(18)  | C7-C6-C11-C10   | -4.1(3)     | Co-N3-C3-N2   | -10.4(2)    |
| N4-Co-N3-C3     | 109.20(14)  | C6-C7-C8-C9     | 2.0(3)      | Co-N3-C3-C4   | 168.49(16)  |
| N4-Co-N3-C11    | -82.23(17)  | C7-C8-C9-C10    | -2.4(4)     | C11-N3-C3-N2  | 179.70(18)  |
| N1_a-Co-N3-C3   | 21.1(2)     | C8-C9-C10-C11   | -0.5(3)     | C11-N3-C3-C4  | -1.5(3)     |
| N1_a-Co-N3-C11  | -170.33(15) | C9-C10-C11-N3   | -177.29(19) | Co-N3-C11-C6  | -162.77(15) |
| N3_a-Co-N3-C3   | -166.03(13) | C9-C10-C11-C6   | 3.8(3)      | Co-N3-C11-C10 | 18.4(3)     |
| C3-N3-C11-C10   | -173.48(18) | N1-C1-C1_a-N1_a | 3.3(3)      | C3-N3-C11-C6  | 5.4(3)      |
| N1-C1-C1_a-C2_a | -174.9(2)   | C2-C1-C1_a-N1_a | -174.9(2)   |               |             |

**Table S3.** Nuclei coordinates of **1** used for CASSCF/NEVPT2 calculations. Non-hydrogen atoms coordinates are taken from single crystal diffraction experiment, hydrogen atoms position are optimized at BP86/ def2-TZVP level of theory.

|    |              |              |              |
|----|--------------|--------------|--------------|
| 27 | 0.00000000   | 0.00000000   | 0.598280000  |
| 16 | 1.341144000  | 4.628719000  | 0.190851000  |
| 7  | 1.197206000  | -0.357581000 | 2.307750000  |
| 7  | 2.466267000  | -0.770990000 | 2.088461000  |
| 1  | 3.006701000  | -1.242448000 | 2.810990000  |
| 7  | 2.060646000  | -0.355510000 | -0.153585000 |
| 7  | 0.375816000  | 2.030852000  | 0.387931000  |
| 6  | 0.702355000  | -0.230230000 | 3.494560000  |
| 6  | 1.412666000  | -0.544531000 | 4.766571000  |
| 1  | 1.027619000  | 0.043951000  | 5.605838000  |
| 1  | 2.488089000  | -0.315391000 | 4.694094000  |
| 1  | 1.320700000  | -1.611017000 | 5.037867000  |
| 6  | 2.886688000  | -0.795925000 | 0.780135000  |
| 6  | 4.182427000  | -1.318888000 | 0.521459000  |
| 1  | 4.814403000  | -1.645489000 | 1.348472000  |
| 6  | 4.579716000  | -1.423350000 | -0.771643000 |
| 1  | 5.554284000  | -1.849180000 | -1.019359000 |
| 6  | 3.743980000  | -0.962478000 | -1.821852000 |
| 6  | 4.109300000  | -1.014956000 | -3.184092000 |
| 1  | 5.060655000  | -1.477207000 | -3.455627000 |
| 6  | 3.287699000  | -0.487897000 | -4.146167000 |
| 1  | 3.577651000  | -0.534876000 | -5.197209000 |
| 6  | 2.087504000  | 0.148442000  | -3.782455000 |
| 1  | 1.462646000  | 0.610622000  | -4.547601000 |
| 6  | 1.705439000  | 0.205048000  | -2.460301000 |
| 1  | 0.801937000  | 0.730177000  | -2.155675000 |
| 6  | 2.505699000  | -0.383640000 | -1.460236000 |
| 6  | 0.779330000  | 3.102195000  | 0.305523000  |
| 7  | -1.197206000 | 0.357581000  | 2.307750000  |
| 7  | -2.466267000 | 0.770990000  | 2.088461000  |
| 1  | -3.006701000 | 1.242447000  | 2.810990000  |
| 7  | -2.060646000 | 0.355510000  | -0.153585000 |
| 6  | -0.702355000 | 0.230230000  | 3.494560000  |
| 6  | -1.412666000 | 0.544531000  | 4.766571000  |
| 1  | -1.027617000 | -0.043948000 | 5.605838000  |
| 1  | -2.488089000 | 0.315388000  | 4.694095000  |
| 1  | -1.320703000 | 1.611018000  | 5.037865000  |

|    |              |              |              |
|----|--------------|--------------|--------------|
| 6  | -2.886688000 | 0.795925000  | 0.780135000  |
| 6  | -4.182427000 | 1.318888000  | 0.521459000  |
| 1  | -4.814403000 | 1.645489000  | 1.348472000  |
| 6  | -4.579716000 | 1.423350000  | -0.771644000 |
| 1  | -5.554284000 | 1.849180000  | -1.019359000 |
| 6  | -3.743980000 | 0.962478000  | -1.821852000 |
| 6  | -4.109300000 | 1.014957000  | -3.184093000 |
| 1  | -5.060655000 | 1.477207000  | -3.455627000 |
| 6  | -3.287699000 | 0.487897000  | -4.146168000 |
| 1  | -3.577651000 | 0.534877000  | -5.197209000 |
| 6  | -2.087504000 | -0.148442000 | -3.782455000 |
| 1  | -1.462647000 | -0.610622000 | -4.547601000 |
| 6  | -1.705439000 | -0.205048000 | -2.460301000 |
| 1  | -0.801937000 | -0.730177000 | -2.155675000 |
| 6  | -2.505699000 | 0.383641000  | -1.460236000 |
| 16 | -1.341144000 | -4.628719000 | 0.190850000  |
| 7  | -0.375816000 | -2.030852000 | 0.387930000  |
| 6  | -0.779330000 | -3.102195000 | 0.305522000  |

**Table S4.** Best fit parameters of the generated Debye model for the Cole-Cole plot of complex **1** at  $H_{DC}=1000$  Oe

| $T, K$ | $\chi_S, \text{cm}^3 \text{mol}^{-1}$ | $\chi_T, \text{cm}^3 \text{mol}^{-1}$ | $\tau, s$ | $\alpha$ | $R_1^a$ |
|--------|---------------------------------------|---------------------------------------|-----------|----------|---------|
| 1.8    | 0.152                                 | 1.285                                 | 4.14E-03  | 0.130    | 3.2E-03 |
| 2.0    | 0.138                                 | 1.179                                 | 2.85E-03  | 0.128    | 2.0E-03 |
| 2.2    | 0.124                                 | 1.084                                 | 1.93E-03  | 0.129    | 1.6E-03 |
| 2.4    | 0.113                                 | 1.020                                 | 1.25E-03  | 0.124    | 1.6E-03 |
| 2.5    | 0.105                                 | 0.949                                 | 1.07E-03  | 0.125    | 8.8E-04 |
| 2.7    | 0.093                                 | 0.880                                 | 7.81E-04  | 0.125    | 6.6E-04 |
| 2.8    | 0.091                                 | 0.844                                 | 6.66E-04  | 0.118    | 7.2E-04 |
| 3.0    | 0.083                                 | 0.794                                 | 5.25E-04  | 0.123    | 4.7E-04 |
| 3.5    | 0.069                                 | 0.682                                 | 3.12E-04  | 0.112    | 3.1E-04 |
| 4.0    | 0.060                                 | 0.611                                 | 2.05E-04  | 0.105    | 1.5E-04 |
| 5.0    | 0.032                                 | 0.484                                 | 1.00E-04  | 0.105    | 6.5E-04 |

<sup>a</sup> The mean residual sum of squares

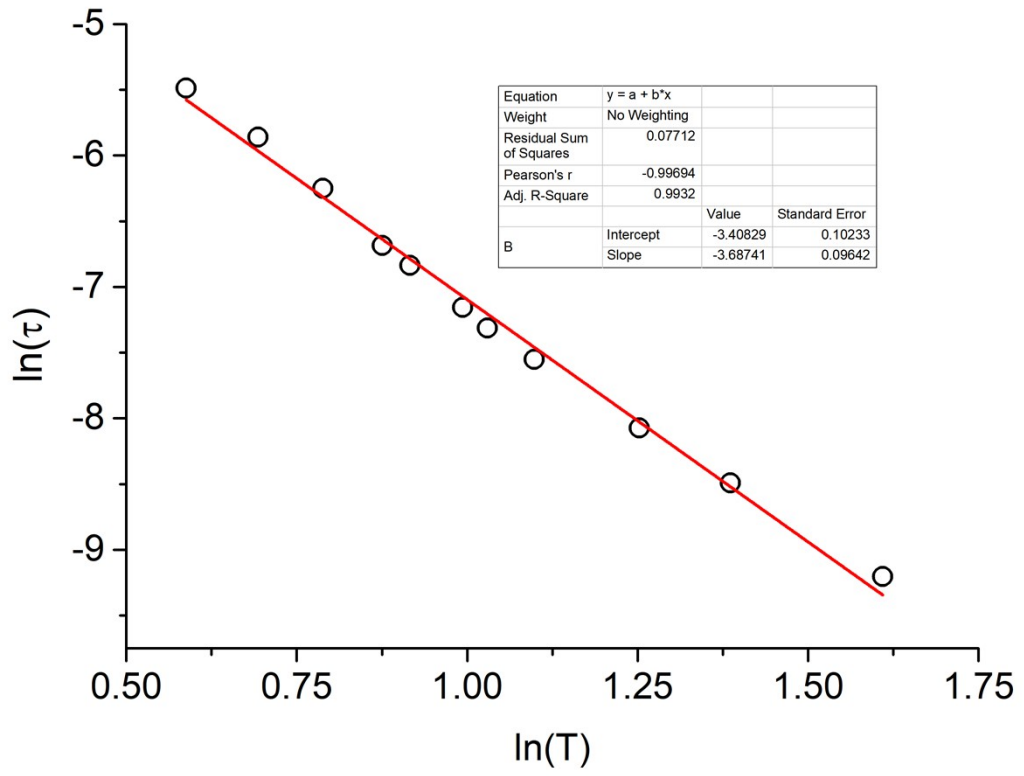

**Fig.S1.**  $\ln(\tau)$  versus  $\ln(T)$  dependence: open circles – experiment, red solid line – linear fit.
